# Supplementary material for: CRISPR/Cas9 microinjection in oocytes disables pancreas development in sheep
Source: PubMed Central journal article supplement (PMC5727233; doi:10.1038/s41598-017-17805-0), 2017-12-12
Supplement: 41598_2017_17805_MOESM1_ESM.pdf [file 41598_2017_17805_MOESM1_ESM.pdf]

## **Supplementary Data**

CRISPR/Cas9 microinjection in oocytes disables pancreas development in sheep

Marcela Vilarino<sup>1,\*</sup>, Sheikh Tamir Rashid<sup>2,\*</sup>, Fabian Patrik Suchy<sup>2,\*</sup>, Bret Roberts McNabb<sup>3</sup>, Talitha van der Meulen<sup>4</sup>, Eli J Fine<sup>2</sup>, Syed Daniyal Ahsan<sup>2</sup>, Nurlybek Mursaliyev<sup>2</sup>, Vittorio Sebastiano<sup>2</sup>, Santiago Sain Diab<sup>5</sup>, Mark O. Huising<sup>4</sup>, Hiromitsu Nakauchi<sup>2, §</sup>, Pablo Juan Ross<sup>1, §</sup>

PDX1 Sheep Locus

5' -GGGCTGGCGCTGAAGTCTGGCGCCGGGCCCGCTGGAACGGCAGGGTCTTGTACAGCTGTGTGCCG-3' gRNA Target Site

|                                                                                                                                                                                         | Mono-allelic mutations                                                                                                                                                                                       |                                                                                                                                                                                                              |                                      |
|-----------------------------------------------------------------------------------------------------------------------------------------------------------------------------------------|--------------------------------------------------------------------------------------------------------------------------------------------------------------------------------------------------------------|--------------------------------------------------------------------------------------------------------------------------------------------------------------------------------------------------------------|--------------------------------------|
| MII oocytes                                                                                                                                                                             | <b>MII #1</b><br>5' -GGGCTGGCGCTGAAGTCTGGCGCCGGGCCCGCTGGAACGGCAGGGTCTTGTACAGCTGTGTGCCG-3'<br>5' -GGGCTGGCGCTGAAGTCTGGCGCCGGGCCCGCTGGAACGGCAGGGTCTTGTACAGCTGTGTGCCG-3'                                        | (WT)<br>(-3)                                                                                                                                                                                                 |                                      |
|                                                                                                                                                                                         | <b>Bi-allelic mutations</b>                                                                                                                                                                                  |                                                                                                                                                                                                              |                                      |
|                                                                                                                                                                                         | <b>MII #5</b><br>5' -GGGCTGGCGCTGAAGTCTGGCG-----TCGTTGTACAGCTGTGGGCCG-3'<br>5' -GGGCTGGCGCTGAAGTCTGGCG-----TCGTTGTACAGCTGTGGGCCG-3'                                                                          | (-27;+1)<br>(-27;+1)                                                                                                                                                                                         |                                      |
|                                                                                                                                                                                         | <b>MII #15</b><br>5' -GGGCTGGCGCTGAAGTCTGGCGCCGGGCCCGCTGGAAC-----GGTCTTGTACAGCTGTGGCCGCGTA-3'<br>5' -GGGCTGGCGCTGAAGTCTGGCGCCGGGCCCGCTGGAAC-----GGTCTTGTACAGCTGTGTGCCGCGTA-3'                                | (-6)<br>(-6)                                                                                                                                                                                                 |                                      |
|                                                                                                                                                                                         | <b>MII #16</b><br>5' -GGGCTGGCGCTGAAGTCTGGCGCCGGTGCAGCTGGGTGGGGCGCGTGAACGGCG-----GTGGCGGCTCAGTACTGCTCCTCGC-3'<br>5' -GGGCTGGCGCTGAAGTCTGGCGCCGGTGCAGCTGGGTGGGGCGCGTGAACGGCG-----GTGGCGGCTCAGTACTGCTCCTCGC-3' | (7subs.;+18;-27)<br>(7subs.;+18;-27)                                                                                                                                                                         |                                      |
|                                                                                                                                                                                         | <b>MII #18</b><br>5' -GGGCTGGCGCTGAAGTCTGGCGCCGGGCCCGCTGGAAC-----CAGGGTCTTGTACAGTTGGGGGCC-3'<br>5' -GGGCTGGCGCTGAAGTCTGGCGCCGGGCCCGCTGGAAC-----CAGGGTCTTGTACAGTTGGGGGCC-3'                                   | (5subs.;+1;-3)<br>(5subs.;+1;-3)                                                                                                                                                                             |                                      |
|                                                                                                                                                                                         | <b>MII #19</b><br>5' -ACAGGCACGACGGGGGCTGGCGCTGAAG-----GGTCTTGTGGCCCTGTGTGCC-3'<br>5' -ACAGGCACGACGGGGGCTGGCGCTGAAG-----GGTCTTGTGGCCCTGTGTGCC-3'                                                             | (-30;4ins.)<br>(-30;4ins.)                                                                                                                                                                                   |                                      |
|                                                                                                                                                                                         | <b>MII #23</b><br>5' -GGGCTGGCGCTGAAGTCTGGCGCCGGGCCCGCTGGAACGGCAGTGAATCTTGTACAGCTGTGTGCCG-3'<br>5' -GGGCTGGCGCTGAAGTCTGGCGCCGGGCCCGCTGGAACGGCAGTGAATCTTGTACAGCTGTGTGCCG-3'                                   | (2subs.)<br>(2subs.)                                                                                                                                                                                         |                                      |
|                                                                                                                                                                                         | Zygotes                                                                                                                                                                                                      | <b>Mono-allelic mutations</b>                                                                                                                                                                                |                                      |
|                                                                                                                                                                                         |                                                                                                                                                                                                              | <b>Z.#3</b><br>5' -GGGCTGGCGCTGAAGTGGGCTCTGGACCGTGGTGGCCGATGGTAC-----GGTCTTGTACATCTGTGTGCCG-3'<br>5' -GGGCTGGCGCTGAAGTCTGGCGCCGGGCCCGCTGGAACGGCAGGGTCTTGTACAGCTGTGTGCCG-3'                                   | (-29)<br>(WT)                        |
|                                                                                                                                                                                         |                                                                                                                                                                                                              | <b>Z.#5</b><br>5' -GGGCTGGCGCTGAAGTCTGGCGCCGGGCCCGCTGGAACGGCAGGGTCTTGTACAGCTGTGTGCCGCTAGT-3'<br>5' -GGGCTGGCGCTGAAGTCTGGCGCCGGGCCCGCTGGAACGGCAGGGTCTTGTACAGCTGTGTGCCG-3'                                     | (1subs.)<br>(WT)                     |
|                                                                                                                                                                                         |                                                                                                                                                                                                              | <b>Z.#20</b><br>5' -GGGCTGGTGGCGATGAGAGGAGCCAGGGGGGTGGTGGTATGTC-----AGGGTCTTGGACCCCTGTGTGCCG-3'<br>5' -GGGCTGGCGCTGAAGTCTGGCGCCGGGCCCGCTGGAACGGCAGGGTCTTGTACAGCTGTGTGCCG-3'                                  | (-26)<br>(WT)                        |
|                                                                                                                                                                                         |                                                                                                                                                                                                              | <b>Bi-allelic mutations</b>                                                                                                                                                                                  |                                      |
|                                                                                                                                                                                         |                                                                                                                                                                                                              | <b>Z.#2:</b><br>5' -GGGCTGGCGCTGAAGTCTGGCGCCGGTCCCGCTG-----CTGCGGGCCGCTAGTACTGCTCCGGCAGATCAAAAAGTCTCCTCGC-3'<br>5' -GGGCTGGCGCTGAAGTCTGGCGCCGGTCCCGCTG-----CTGCGGGCCGCTAGTACTGCTCCGGCAGATCAAAAAGTCTCCTCGC-3' | (3subs.;+21;-24)<br>(3subs.;+21;-24) |
| <b>Z.#12</b><br>5' -GGGCTGGCGCTGAAGTC-----AGGGTCTTGTACAGCTGTGTGCCG-3'<br>5' -GGGCTGGCGCTGAAGTC-----AGGGTCTTGTACAGCTGTGTGCCG-3'                                                          |                                                                                                                                                                                                              | (-26)<br>(-26)                                                                                                                                                                                               |                                      |
| <b>Z.#4</b><br>5' -GGGCTGGCGCTGAAGTGGGCTCTTGGACCCGTTGGTGGCCGATGGTAC-----GGTCTTGTAGATCTGTGTGCCG-3'<br>5' -GGGCTGGCGCTGAAGTGGGCTCTTGGACCCGTTGGTGGCCGATGGTAC-----GGTCTTGTAGATCTGTGTGCCG-3' |                                                                                                                                                                                                              | (-29;1subs.)<br>(-29;1subs.)                                                                                                                                                                                 |                                      |

**Supplementary Figure S1. Genotypes of the *PDX1* edited embryos injected at the MII oocyte or zygote stage.** Sanger sequencing results from bi-allelic and a mono-allelic mutant sheep blastocyst are shown. The PAM sequence is underlined and the target region is shown in blue. Red dashes represent deletions and red letters insertions/substitutions.

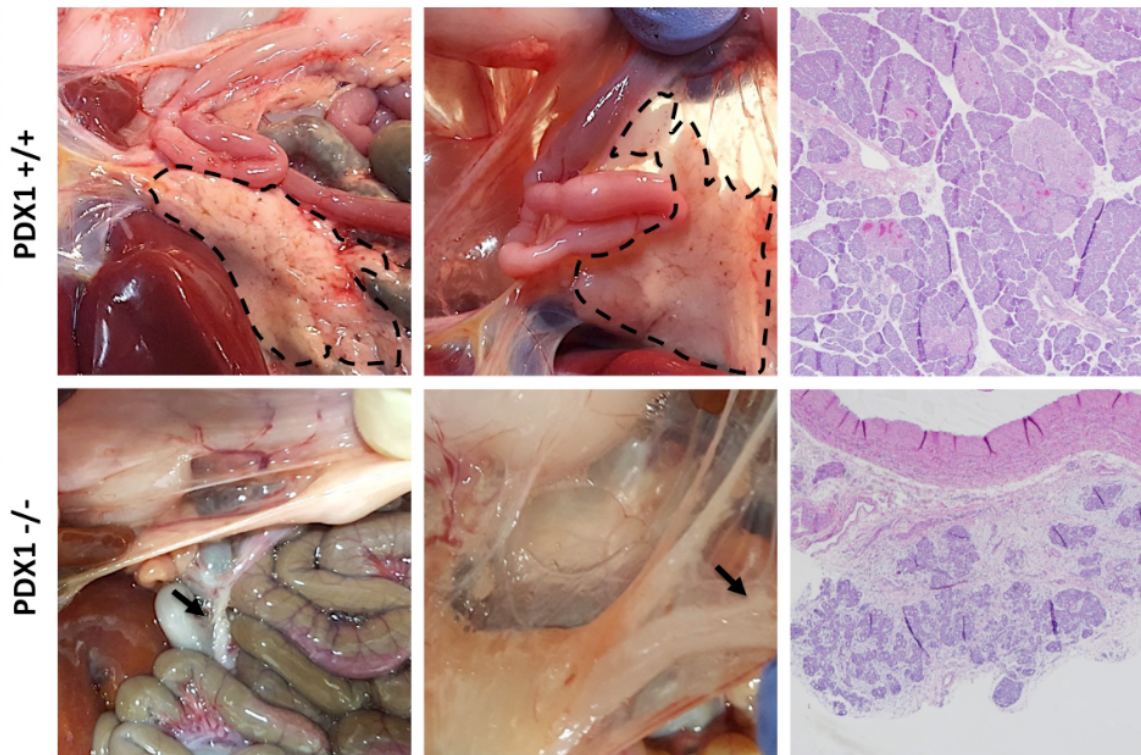

**Supplementary Figure S2.** The two left panels are macroscopic appearance of the vestigial pancreas (arrowheads) of the PDX1-KO fetus and the pancreas of a WT fetus (black dashes) at 4 months old of gestation. St.: stomach; D.: duodenum. The right panel is representative images (100X) of the pancreas and vestigial structure stained with hematoxylin and eosin.

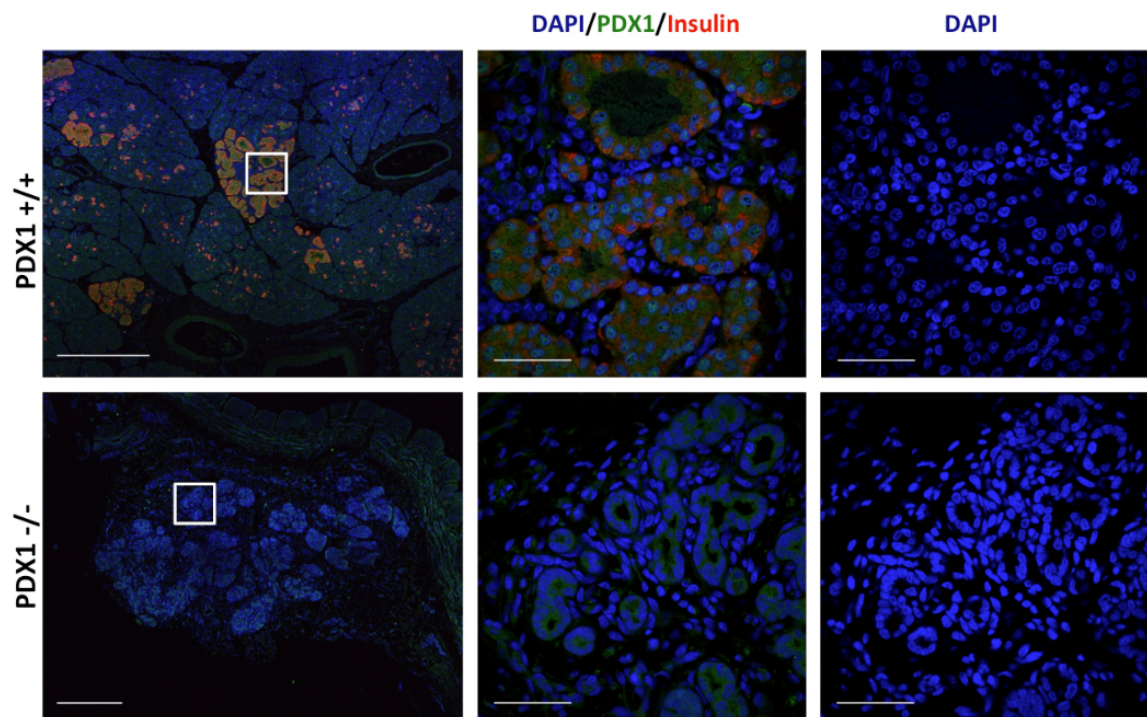

**Supplementary Figure S3.** Confocal microscopy of PDX1 (green) and Insulin (red) double immunostaining, and DAPI staining (blue) of a PDX1-KO 4 month-old fetus compared to a WT fetus of the same age. Scale bars in overviews 500  $\mu\text{m}$ , in details 50  $\mu\text{m}$ .

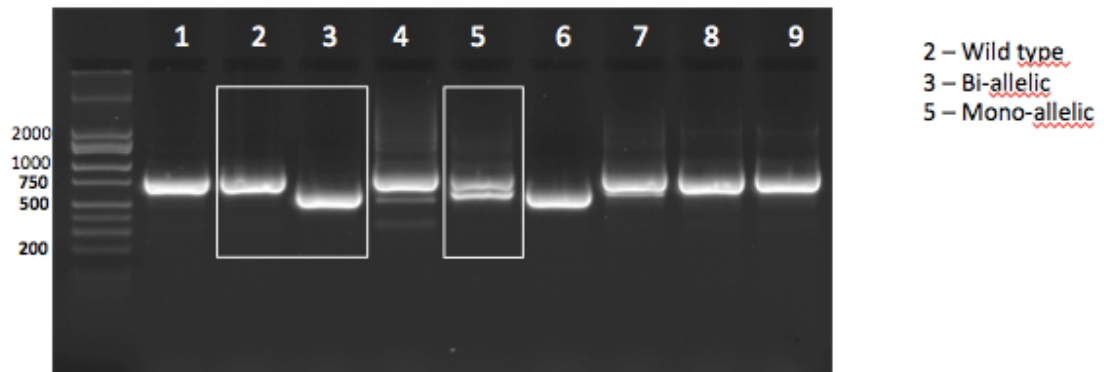

**Full gel image for Figure 4a.** Gel electrophoresis of PCR product of Sheep embryos injected with PDX1 sgRNA 1 & PDX1 sgRNA2.

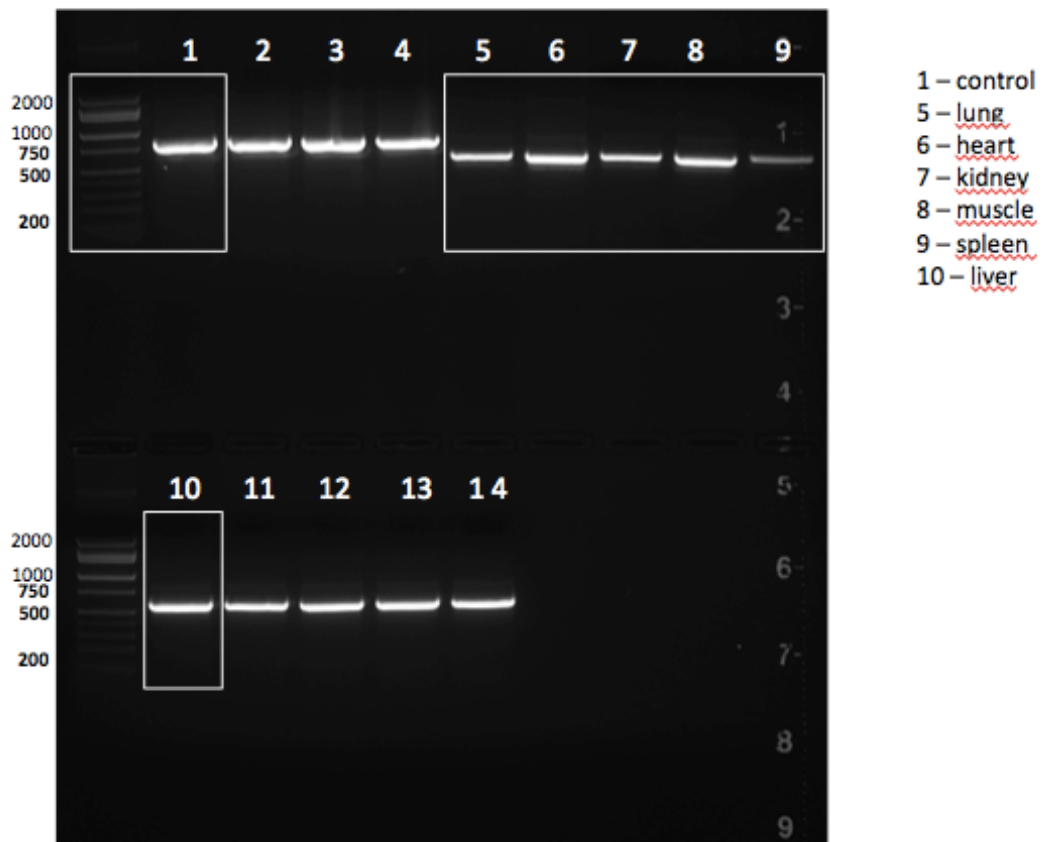

**Full gel image for Figure 4d.** Gel electrophoresis of PCR product -using specific primers for *PDX1*- from different tissues (liver, lung, heart, kidney, muscle and spleen) of the mutant fetus.

Table S1. Lysis and development rate after microinjection of MII oocytes and Zygotes. Embryos were produced by *in vitro* fertilization (IVF) or parthenogenetic activation (PA).

| Replicate | IVP method | Group   | Lysis rate (%) | Blastocyst rate (%) |
|-----------|------------|---------|----------------|---------------------|
| 1         | IVF        | Control |                | 7/41 (17.1%)        |
|           |            | MI      | 4/82 (4.9%)    | 14/78 (17.9%)       |
|           |            | Zygote  | 13/74 (17.6%)  | 4/61 (6.6%)         |
| 2         | IVF        | Control |                | 21/97 (21.6%)       |
|           |            | MI      | 3/66 (4.5%)    | 12/63 (19%)         |
|           |            | Zygote  | 7/67 (10.4%)   | 6/60 (10.0%)        |
| 3         | IVF        | Control |                | 19/31 (61.3%)       |
|           |            | MI      | 1/58 (1.7%)    | 25/57 (43.9%)       |
|           |            | Zygote  | 14/85 (16.5%)  | 13/71 (18.3%)       |
| 4         | PA         | Control |                | 20/50 (40%)         |
|           |            | MI      | 2/63 (3.2%)    | 20/61 (32.8%)       |
|           |            | Zygote  | 1/50 (2%)      | 9/49 (18.4%)        |
| 5         | PA         | Control |                | 20/57 (35.1%)       |
|           |            | MI      | 0/110 (0%)     | 29/110 (26.4%)      |
|           |            | Zygote  | 12/100 (12%)   | 21/88 (23.9%)       |

Table S2. Oligos/Primers used in this study (5' – 3'). Underlined sequences are: gRNAs (Oligos for gRNA synthesis); and 16 bp barcodes (Primers for NGS).

| <b>Oligos for gRNA synthesis</b>     |                                                                                 |
|--------------------------------------|---------------------------------------------------------------------------------|
| Oligo name                           | Sequence                                                                        |
| oPDX1-single gRNA                    | GAAATTAATACGACTCACTATAGGGGGCCCCGCTGGAACGCGCAGGTTTTAGAGCTAGAAATAGC               |
| oPDX1- dual gRNA1                    | TAATACGACTCACTATAGCGTACGGGGAGATGTCCGGGTTTTAGAGCTAGAAATAGC                       |
| oPDX1- dual gRNA2                    | TAATACGACTCACTATAGCACGCGTGGAAAGGCCAGTGTTTTAGAGCTAGAAATAGC                       |
| T7-Reverse constant                  | AAAAGCACCGACTCGGTGCCACTTTTTCAAGTTGATAACGGACTAGCCTTATTTAACTTGCTATTTCTAGCTCTAAAAC |
| <b>Primers for PCR amplification</b> |                                                                                 |
| Primer name                          | Sequence                                                                        |
| oPDX1-F                              | GAACCGCGAGGAGCAGTA                                                              |
| oPDX1-R-single gRNA                  | GAGCGGAGGCACCTCGTAT                                                             |
| oPDX1-R-dual gRNA                    | CGACGGCACTGAGGAGTC                                                              |
| <b>Primers for NGS</b>               |                                                                                 |
| Primer name                          | Sequence                                                                        |
| oPDX1-F-BC1                          | <u>TCAGACGATGCGTCATGAACCGCGAGGAGCAGTA</u>                                       |
| oPDX1-F-BC17                         | <u>CATAGCGACTATCGTGGAACCGCGAGGAGCAGTA</u>                                       |
| oPDX1-F-BC29                         | <u>GCTCGACTGTGAGAGAGAACCGCGAGGAGCAGTA</u>                                       |
| oPDX1-F-BC34                         | <u>ACTCTCGCTCTGTAGAGAACCGCGAGGAGCAGTA</u>                                       |
| oPDX1-F-BC38                         | <u>TGCTCGCAGTATCACAGAACCGCGAGGAGCAGTA</u>                                       |
| oPDX1-F-BC40                         | <u>CAGTGAGAGCGCGATAGAACCGCGAGGAGCAGTA</u>                                       |
| oPDX1-R-BC48                         | <u>TCACACTCTAGAGCGAGAGCGGAGGCACCTCGTAT</u>                                      |
| oPDX1-R-BC52                         | <u>GCAGACTCTCACACGCGAGCGGAGGCACCTCGTAT</u>                                      |
| oPDX1-R-BC54                         | <u>GTGTGAGATATATATCGAGCGGAGGCACCTCGTAT</u>                                      |
| oPDX1-R-BC62                         | <u>GACAGCATCTGCGCTCGAGCGGAGGCACCTCGTAT</u>                                      |
| oPDX1-R-BC70                         | <u>CTGCGCAGTACGTGCAGAGCGGAGGCACCTCGTAT</u>                                      |
| oPDX1-R-BC09                         | <u>CTGCGTGCTCTACGACGAGCGGAGGCACCTCGTAT</u>                                      |
